# Supplementary material for: Daratumumab plus lenalidomide and dexamethasone versus lenalidomide and dexamethasone in relapsed or refractory multiple myeloma: updated analysis of POLLUX
Source: PubMed Central journal article supplement — Haematologica. 2018 Sep 20;103(12):2088–96. doi: 10.3324/haematol.2018.194282 (PMC6269302; doi:10.3324/haematol.2018.194282), 2018-12
Supplement: 2018.194282.DIMOPOULOS_SUPPL.pdf [file 2018.194282.DIMOPOULOS_SUPPL.pdf]

## Daratumumab plus lenalidomide and dexamethasone versus lenalidomide and dexamethasone in relapsed or refractory multiple myeloma: updated analysis of POLLUX

Meletios A. Dimopoulos,<sup>1</sup> Jesus San-Miguel,<sup>2</sup> Andrew Belch,<sup>3</sup> Darrell White,<sup>4</sup> Lotfi Benboubker,<sup>5</sup> Gordon Cook,<sup>6</sup> Merav Leiba,<sup>7</sup> James Morton,<sup>8</sup> P. Joy Ho,<sup>9</sup> Kihyun Kim,<sup>10</sup> Naoki Takezako,<sup>11</sup> Philippe Moreau,<sup>12</sup> Jonathan L. Kaufman,<sup>13</sup> Heather J. Sutherland,<sup>14</sup> Marc Lalancette,<sup>15</sup> Hila Magen,<sup>16</sup> Shinsuke Iida,<sup>17</sup> Jin Seok Kim,<sup>18</sup> H. Miles Prince,<sup>19</sup> Tara Cochrane,<sup>20</sup> Albert Oriol,<sup>21</sup> Nizar J. Bahlis,<sup>22</sup> Ajai Chari,<sup>23</sup> Lisa O'Rourke,<sup>24</sup> Kaida Wu,<sup>24</sup> Jordan M. Schecter,<sup>25</sup> Tineke Casneuf,<sup>26</sup> Christopher Chiu,<sup>24</sup> David Soong,<sup>24</sup> A. Kate Sasser,<sup>27</sup> Nushmia Z. Khokhar,<sup>24</sup> Hervé Avet-Loiseau<sup>28</sup> and Saad Z. Usmani<sup>29</sup>

<sup>1</sup>The National and Kapodistrian University of Athens, Greece; <sup>2</sup>Clínica Universidad de Navarra-CIMA, IDISNA, CIBERONC, Pamplona, Spain; <sup>3</sup>Department of Oncology, University of Alberta Cross Cancer Institute, Edmonton, Alberta, Canada; <sup>4</sup>QEII Health Sciences Center and Dalhousie University, Halifax, Nova Scotia, Canada; <sup>5</sup>Service d'Hématologie et Thérapie Cellulaire, Hôpital Bretonneau, Centre Hospitalier Régional Universitaire (CHRU), Tours, France; <sup>6</sup>St James's Institute of Oncology, Leeds Teaching Hospitals NHS Trust and University of Leeds, UK; <sup>7</sup>Sheba Medical Center, Tel Hashomer, Ramat Gan, Israel; <sup>8</sup>Ikon Cancer Care, South Brisbane, QLD, Australia; <sup>9</sup>Institute of Haematology, Royal Prince Alfred Hospital, Camperdown, NSW, Australia; <sup>10</sup>Department of Medicine, Samsung Medical Center, Sungkyunkwan University School of Medicine, Seoul, South Korea; <sup>11</sup>Department of Hematology, National Hospital Organization Disaster Medical Center of Japan, Tachikawa, Japan; <sup>12</sup>Department of Hematology, University Hospital Hôtel-Dieu, Nantes, France; <sup>13</sup>Winship Cancer Institute, Emory University, Atlanta, GA, USA; <sup>14</sup>Leukemia/Bone Marrow Transplant Program, University of British Columbia, Vancouver, Canada; <sup>15</sup>CHU de Québec Research Center, Faculty of Medicine, Laval University, Canada; <sup>16</sup>Institute of Hematology, Davidoff Cancer Center, Beilinson Hospital, Rabin Medical Center, Petah-Tikva, Israel; <sup>17</sup>Department of Hematology and Oncology, Nagoya City University Graduate School of Medical Sciences, Japan; <sup>18</sup>Yonsei University College of Medicine, Severance Hospital, Seoul, South Korea; <sup>19</sup>Cabrini Hospital, Epworth HealthCare and Sir Peter MacCallum Department of Oncology, University of Melbourne, VIC, Australia; <sup>20</sup>Gold Coast University Hospital, Southport, QLD, Australia; <sup>21</sup>Institut Català d'Oncologia i Institut Josep Carreras, Hospital Germans Trias i Pujol, Barcelona, Spain; <sup>22</sup>University of Calgary, Arnie Charbonneau Cancer Institute, Alberta, Canada; <sup>23</sup>Icahn School of Medicine at Mount Sinai, New York, NY, USA; <sup>24</sup>Janssen Research & Development, LLC, Spring House, PA, USA; <sup>25</sup>Janssen Research & Development, LLC, Raritan, NJ, USA; <sup>26</sup>Janssen Research & Development, Beerse, Belgium; <sup>27</sup>Genmab US, Inc, Princeton, NJ, USA; <sup>28</sup>Unite de Genomique du Myelome, IUC-Oncopole, Toulouse, France and <sup>29</sup>Levine Cancer Institute/Atrium Health, Charlotte, NC, USA

©2018 Ferrata Storti Foundation. This is an open-access paper. doi:10.3324/haematol.2018.194282

Received: March 27, 2018.

Accepted: August 21, 2018.

Pre-published: September 20, 2018.

Correspondence: mdimop@med.uoa.gr

## **APPENDIX**

**Daratumumab plus lenalidomide and dexamethasone versus lenalidomide and dexamethasone in relapsed or refractory multiple myeloma: updated analysis of POLLUX**

## **METHODS**

### **Safety**

Safety assessments included evaluation of adverse events, vital signs, electrocardiograms, physical examinations, and clinical laboratory tests. Patients who discontinued treatment were assessed for safety at follow-up.

### **Minimal Residual Disease**

Minimal residual disease (MRD) was evaluated on bone marrow aspirates that were prepared with Ficoll using the clonoSEQ™ V1.3 assay (Adaptive Biotechnologies, Seattle, WA, USA) at sensitivities of 0.001% (1 cancer cell per 100,000 nucleated cells or  $10^{-5}$ ) and 0.0001% ( $10^{-6}$ ). To allow for stringent, unbiased MRD evaluation, the entire intent-to-treat population was evaluated, and patients were considered MRD positive if they had MRD-positive test results or no MRD assessment.

### **Cytogenetic Risk**

For t(4;14), translocations were detected via RNA-seq reads fused between immunoglobulin heavy locus and *WHSC1* or *FGFR3*. For t(14;16), translocations involved immunoglobulin heavy locus and *WWOX*. Tophat-Fusion<sup>1</sup> and deFuse<sup>2</sup> were used for translocation detection. For del17p detection using exome-seq, a >50% deletion cut-off of the 17p region was utilized with CNVkit<sup>3</sup> and CNV Radar (manuscript in preparation).

### **Health-related Quality of Life Measures**

Changes from baseline with the EuroQol 5-Dimension Questionnaire Utility and Visual Analog Scale Scores and the European Organization for Research and Treatment of Cancer Quality of

Life Questionnaire Core-30 Global Health Status Score were assessed every 4 weeks up to Week 116 using a Mixed Model for Repeated Measures (missing at random).

### **Statistical Analyses**

Progression-free survival was compared between treatment groups based on a stratified log-rank test. Hazard ratios and 95% confidence intervals were estimated using a Cox regression model with treatment as the sole explanatory variable, and the Kaplan-Meier method was used to estimate the distributions. Stratified Cochran-Mantel-Haenszel tests were used to test treatment differences in overall response rate and rates of very good partial response or better and complete response or better.

**Appendix Table 1. Best Confirmed Response in the Response-evaluable Population**

|                         | <b>D-Rd</b><br><b>(n = 281)</b> | <b>Rd</b><br><b>(n = 276)</b> |
|-------------------------|---------------------------------|-------------------------------|
| ORR, n (%) <sup>a</sup> | 261 (92.9)                      | 211 (76.4)                    |
| ≥CR <sup>a</sup>        | 144 (51.2)                      | 58 (21.0)                     |
| sCR                     | 73 (26.0)                       | 24 (8.7)                      |
| CR                      | 71 (25.3)                       | 34 (12.3)                     |
| ≥VGPR <sup>a</sup>      | 221 (78.6)                      | 132 (47.8)                    |
| VGPR                    | 77 (27.4)                       | 74 (26.8)                     |
| PR                      | 40 (14.2)                       | 79 (28.6)                     |
| MR                      | 5 (1.8)                         | 26 (9.4)                      |
| SD                      | 13 (4.6)                        | 33 (12.0)                     |
| PD                      | 0 (0.0)                         | 4 (1.4)                       |
| NE                      | 2 (0.7)                         | 2 (0.7)                       |

D-Rd, daratumumab/lenalidomide/dexamethasone; Rd, lenalidomide/dexamethasone; ORR, overall response rate; CR, complete response; sCR, stringent complete response; VGPR, very good partial response; PR, partial response; MR, minimal response; SD, stable disease; PD, progressive disease; NE, not evaluable.

<sup>a</sup>*P* <0.0001 for D-Rd versus Rd.

**Appendix Table 2. Progression-free Survival of Other Immunomodulatory Drug-containing Regimens by Subgroup**

**ASPIRE<sup>4-6</sup>**

|                       | 1PL                |                   | 2-3PL              |                   | Prior lenalidomide |                  | Nonresponsive to bortezomib |                  | Early disease relapse <sup>a</sup> |                   |
|-----------------------|--------------------|-------------------|--------------------|-------------------|--------------------|------------------|-----------------------------|------------------|------------------------------------|-------------------|
| <b>Median PFS, mo</b> | <u>KRd</u><br>29.6 | <u>Rd</u><br>17.6 | <u>KRd</u><br>25.8 | <u>Rd</u><br>16.7 | <u>KRd</u><br>N/A  | <u>Rd</u><br>N/A | <u>KRd</u><br>N/A           | <u>Rd</u><br>N/A | <u>KRd</u><br>24.1                 | <u>Rd</u><br>12.5 |
| <b>HR</b>             | 0.69               |                   | 0.69               |                   | 0.80               |                  | 0.80                        |                  | 0.75                               |                   |
| <b>95% CI</b>         | N/A                |                   | N/A                |                   | 0.52-1.22          |                  | 0.49-1.30                   |                  | 0.50-1.13                          |                   |
| <b>P value</b>        | 0.0083             |                   | 0.0017             |                   | N/A                |                  | N/A                         |                  | N/A                                |                   |

**ELOQUENT-2<sup>7,8</sup>**

|                       | 1PL               |                  | 2-3PL             |                  | Prior lenalidomide |                  | Prior bortezomib   |                   |
|-----------------------|-------------------|------------------|-------------------|------------------|--------------------|------------------|--------------------|-------------------|
| <b>Median PFS, mo</b> | <u>ERd</u><br>N/A | <u>Rd</u><br>N/A | <u>ERd</u><br>N/A | <u>Rd</u><br>N/A | <u>ERd</u><br>24.9 | <u>Rd</u><br>7.4 | <u>ERd</u><br>18.5 | <u>Rd</u><br>12.9 |
| <b>HR</b>             | 0.75              |                  | 0.65              |                  | 0.55               |                  | 0.68               |                   |
| <b>95% CI</b>         | 0.56-1.00         |                  | 0.49-0.87         |                  | 0.24-1.25          |                  | 0.55-0.85          |                   |
| <b>P value</b>        | N/A               |                  | N/A               |                  | N/A                |                  | N/A                |                   |

**TOURMALINE-MM1<sup>9</sup>**

|                       | 1PL                |                   | 2PL                |                   | 3PL              |                   | Prior IMiD       |                   | Prior PI           |                   | Refractory to last line of therapy |                 |
|-----------------------|--------------------|-------------------|--------------------|-------------------|------------------|-------------------|------------------|-------------------|--------------------|-------------------|------------------------------------|-----------------|
| <b>Median PFS, mo</b> | <u>NRd</u><br>20.6 | <u>Rd</u><br>15.9 | <u>NRd</u><br>17.5 | <u>Rd</u><br>14.1 | <u>NRd</u><br>NE | <u>Rd</u><br>10.2 | <u>NRd</u><br>NE | <u>Rd</u><br>17.5 | <u>NRd</u><br>18.4 | <u>Rd</u><br>13.6 | <u>NRd</u><br>NE                   | <u>Rd</u><br>NE |
| <b>HR</b>             | 0.83               |                   | 0.75               |                   | 0.37             |                   | 0.74             |                   | 0.74               |                   | 0.71                               |                 |
| <b>95% CI</b>         | N/A                |                   | N/A                |                   | N/A              |                   | N/A              |                   | N/A                |                   | N/A                                |                 |
| <b>P value</b>        | N/A                |                   | N/A                |                   | N/A              |                   | N/A              |                   | N/A                |                   | N/A                                |                 |

PFS, progression-free survival; HR, hazard ratio; CI, confidence interval; PL, prior line; KRd, carfilzomib/lenalidomide/dexamethasone; Rd, lenalidomide/dexamethasone; N/A, not available; ERd, elotuzumab/lenalidomide/dexamethasone; IMiD, immunomodulatory drug; PI, proteasome inhibitor; NRd, ixazomib/lenalidomide/dexamethasone; NE, not evaluable.  
<sup>a</sup>≤12 months from starting the first prior regimen.

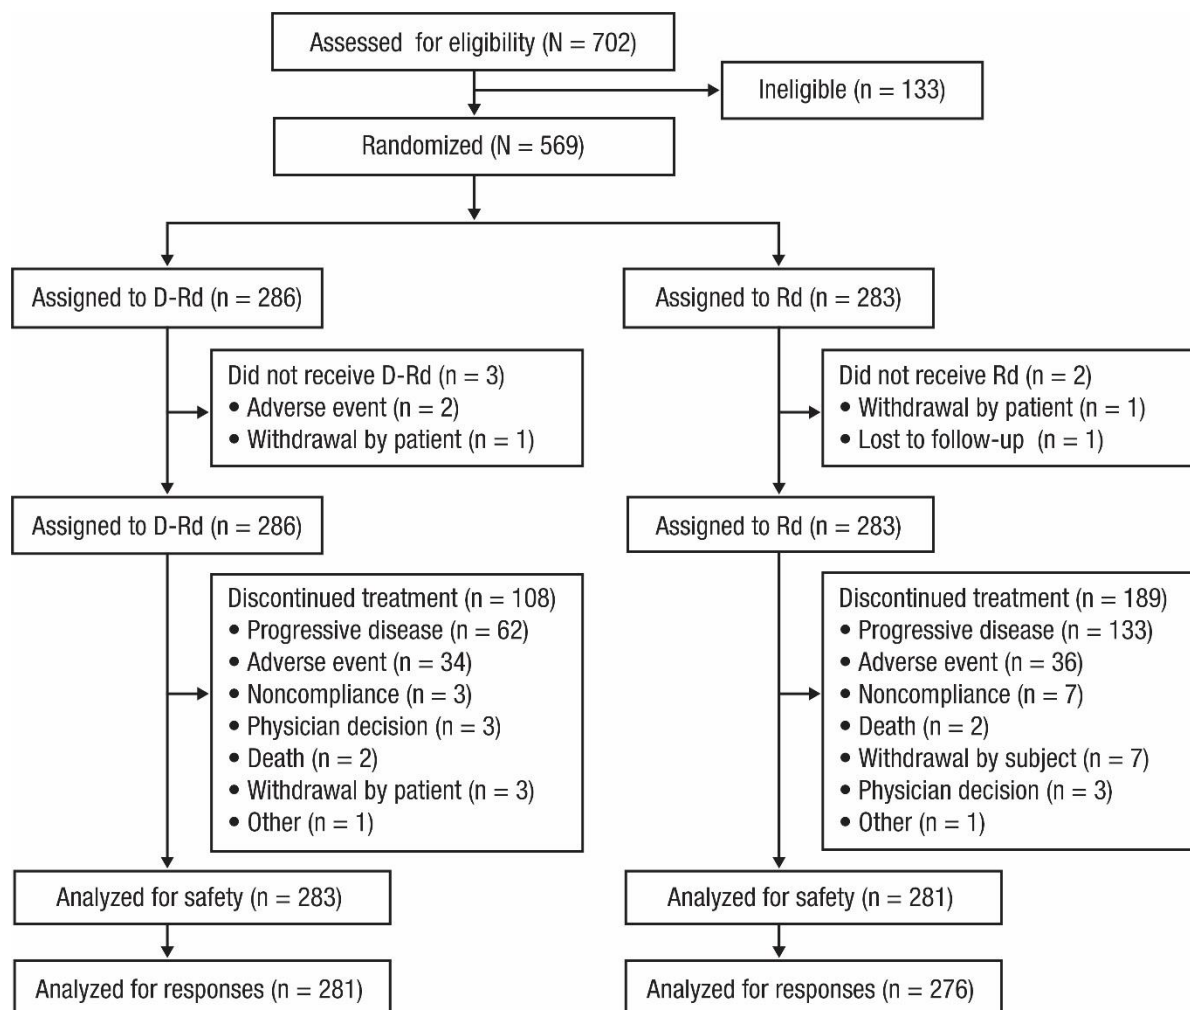

**Appendix Figure 1. CONSORT diagram for POLLUX.** Flow diagram of patients in POLLUX who were randomized to treatment, analyzed, and discontinued treatment. D-Rd, daratumumab/lenalidomide/dexamethasone; Rd, lenalidomide/dexamethasone.



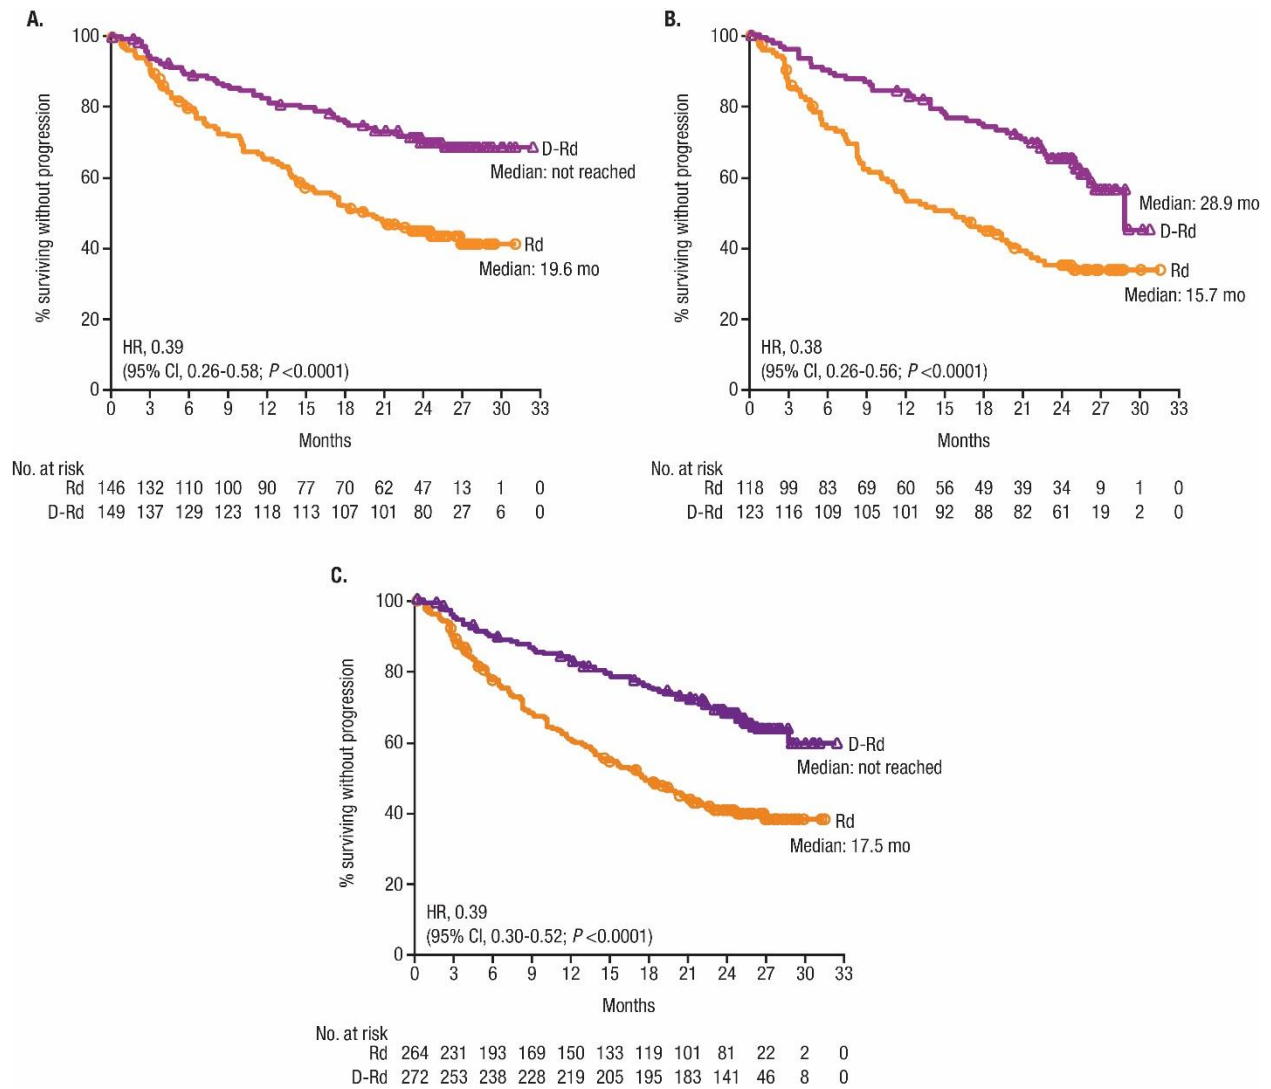

**Appendix Figure 2. Progression-free survival in patients who received (A) 1 prior line of therapy, (B) 2 to 3 prior lines of therapy, and (C) 1 to 3 prior lines of therapy.** Kaplan-Meier estimates of progression-free survival among patients in the intent-to-treat population. D-Rd, daratumumab/lenalidomide/dexamethasone; Rd, lenalidomide/dexamethasone; HR, hazard ratio; CI, confidence interval.

## References

1. Kim D, Salzberg SL. TopHat-Fusion: An algorithm for discovery of novel fusion transcripts. *Genome Biol.* 2011;12(8):R72.
2. McPherson A, Hormozdiari F, Zayed A, et al. deFuse: An algorithm for gene fusion discovery in tumor RNA-Seq data. *PLoS Comput Biol.* 2011;7(5):e1001138.
3. Talevich E, Shain AH, Botton T, Bastian BC. CNVkit: Genome-wide copy number detection and visualization from targeted DNA sequencing. *PLoS Comput Biol.* 2016;12(4):e1004873.
4. Dimopoulos A, Stewart AK, Rajkumar SV, et al. Effect of carfilzomib, lenalidomide, and dexamethasone (KRd) vs lenalidomide and dexamethasone (Rd) in patients with relapsed multiple myeloma (RMM) by line of therapy: secondary analysis from an interim analysis of the phase III study ASPIRE (NCT01080391). *J Clin Oncol.* 2015;33(15\_suppl):8525.
5. Stewart AK, Rajkumar SV, Dimopoulos MA, et al. Carfilzomib, lenalidomide, and dexamethasone for relapsed multiple myeloma. *N Engl J Med.* 2015;372(2):142–152.
6. Ludwig H, Dimopoulos MA, Masszi T, et al. Carfilzomib, lenalidomide, and dexamethasone (KRd) vs lenalidomide and dexamethasone (Rd) in patients with relapsed multiple myeloma (RMM) and early progression during prior therapy: Secondary analysis from the phase 3 study ASPIRE (NCT01080391). *J Clin Oncol.* 2016;34(15\_suppl):8045.
7. Lonial S, Richardson PG, Mateos MV, et al. ELOQUENT-2 update: Phase III study of elotuzumab plus lenalidomide/dexamethasone (ELd) vs Ld in relapsed/refractory multiple myeloma (RRMM)—identifying responders by subset analysis. *J Clin Oncol.* 2016;34(15\_suppl):8037.

8. Lonial S, Dimopoulos M, Palumbo A, et al. Elotuzumab therapy for relapsed or refractory multiple myeloma. *N Engl J Med.* 2015;373(7):621–631.
9. Moreau P, Masszi T, Grzasko N, et al. Oral ixazomib, lenalidomide, and dexamethasone for multiple myeloma. *N Engl J Med.* 2016;374(17):1621–1634.
